# Supplementary material
Source: PubMed Central journal article supplement (PMC8629951)

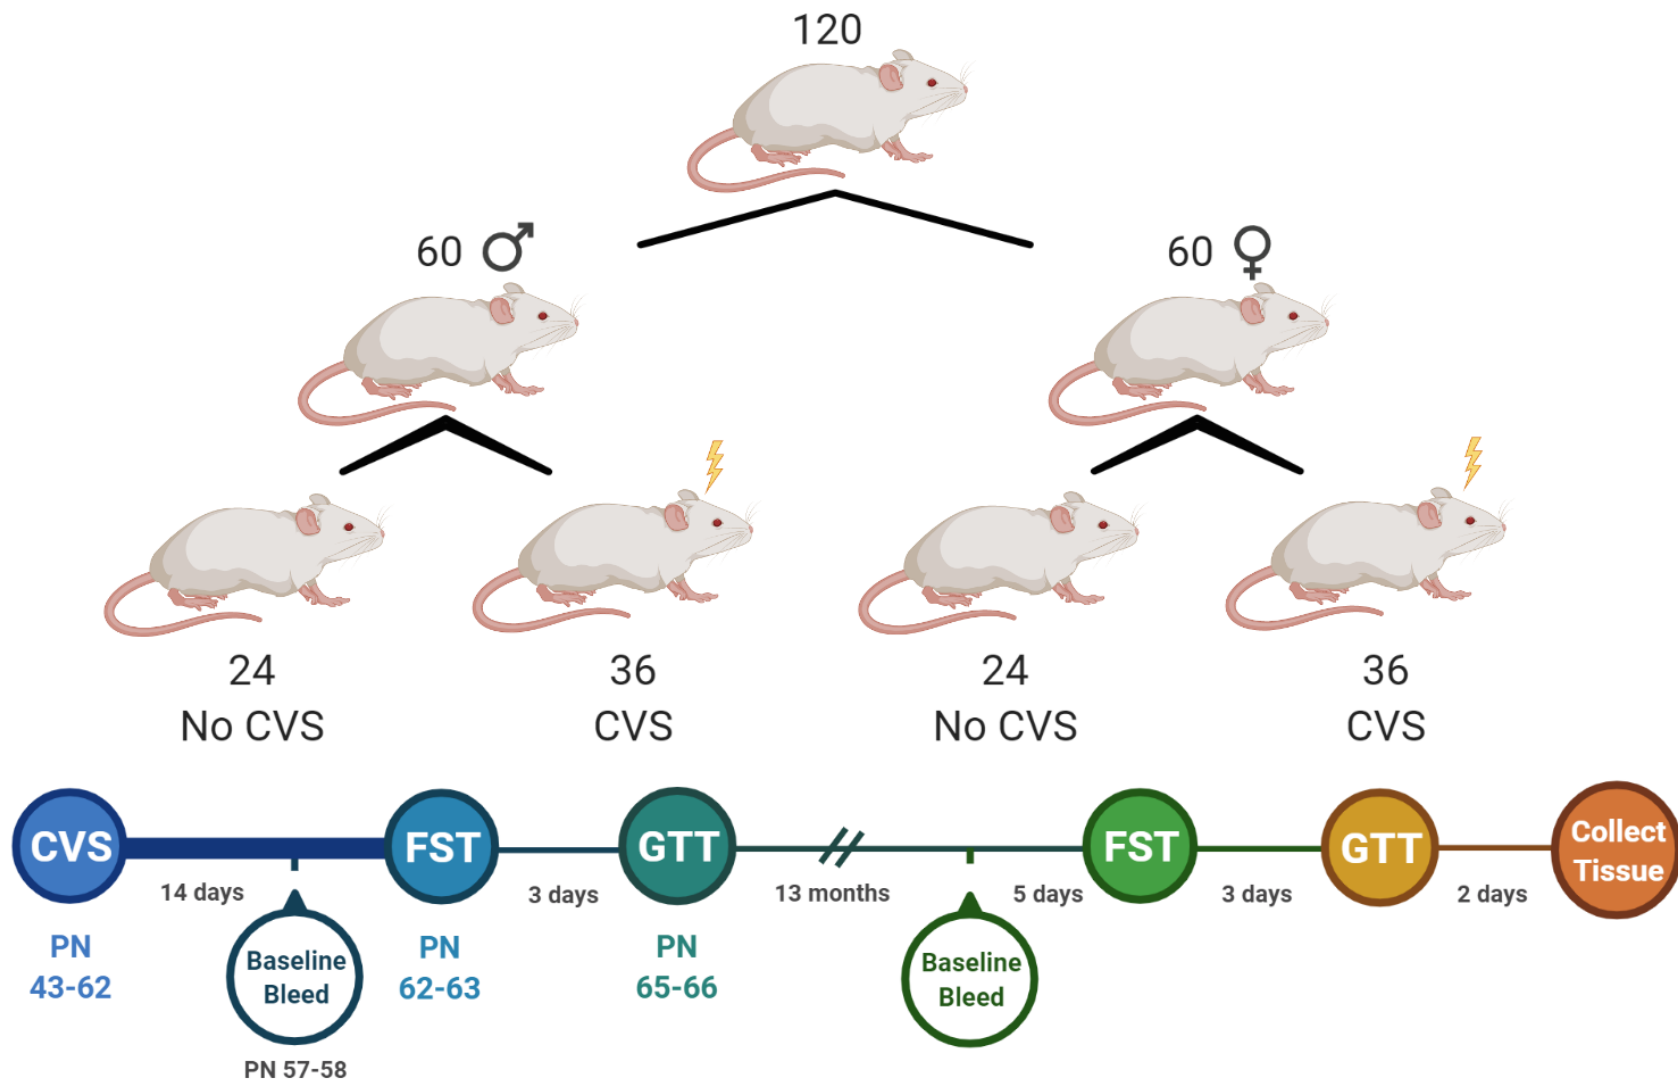

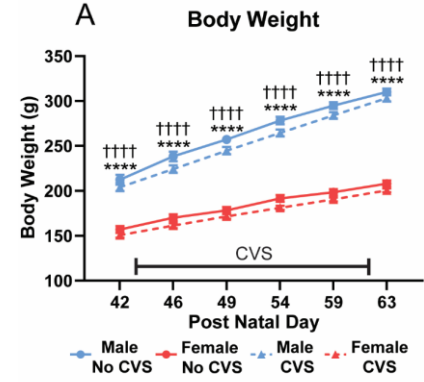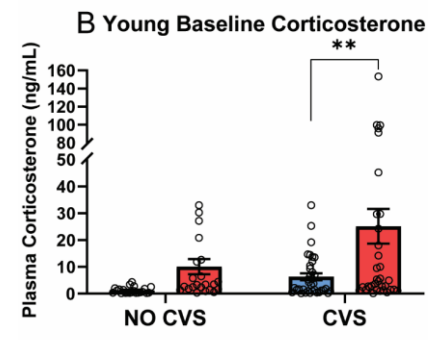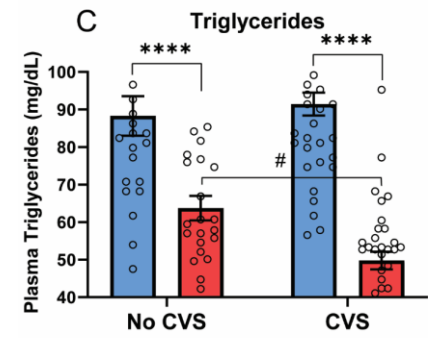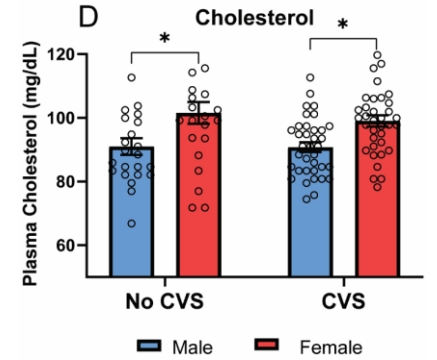

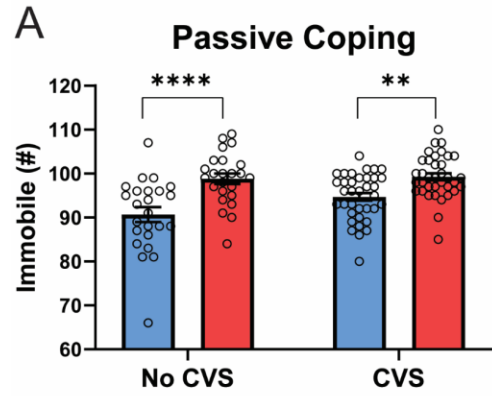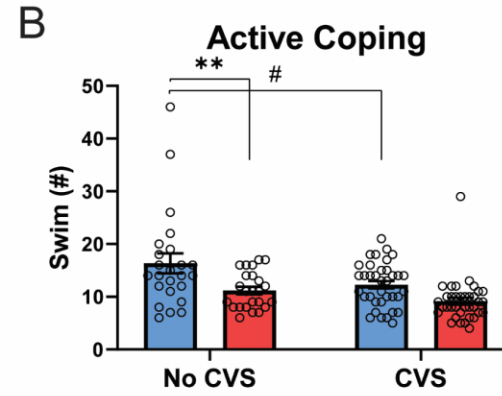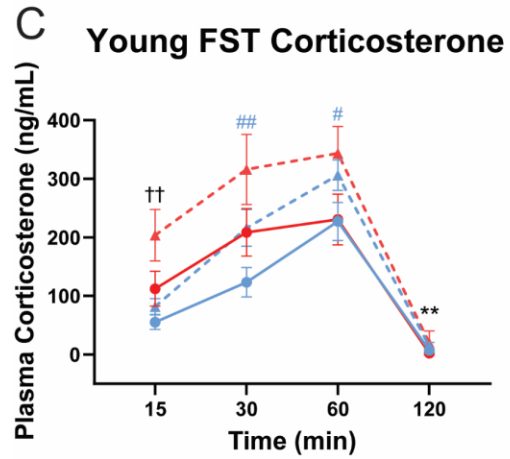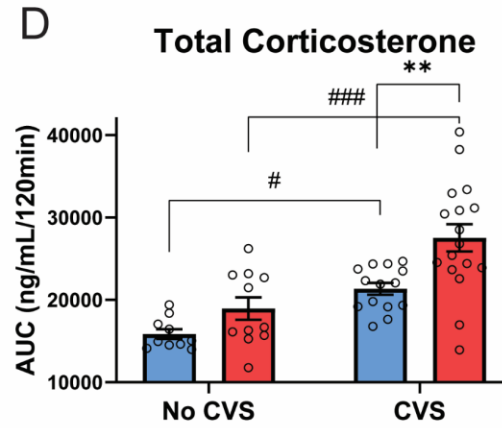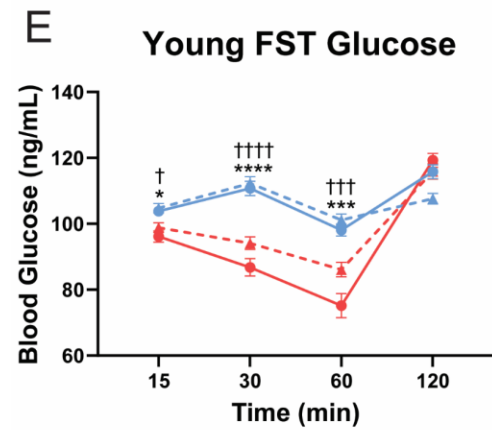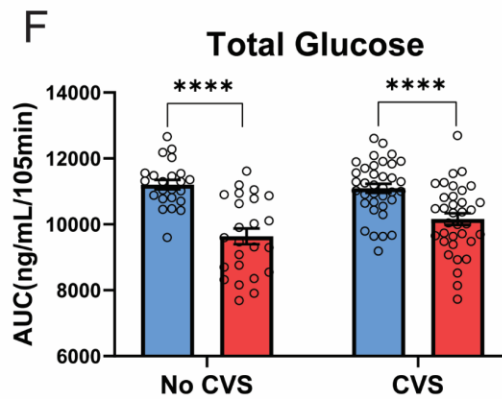

—●— Male No CVS   
 —●— Female No CVS   
 - - -●- - - Male CVS   
 - - -●- - - Female CVS

■ Male   
 ■ Female

**A Young GTT Glucose**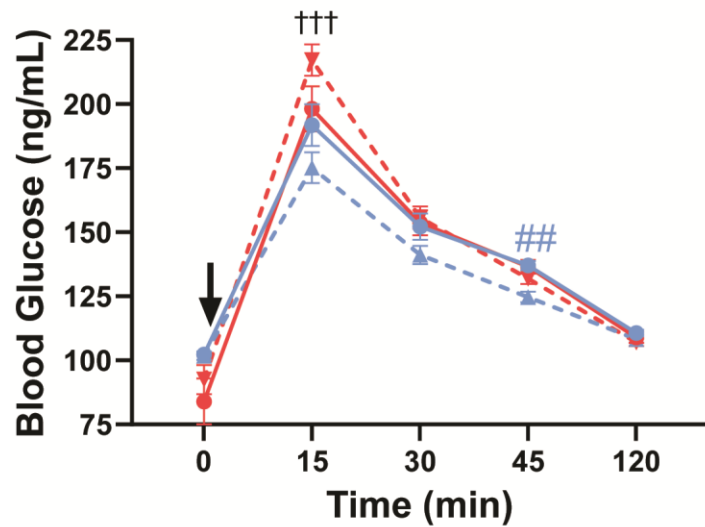**B Total Glucose**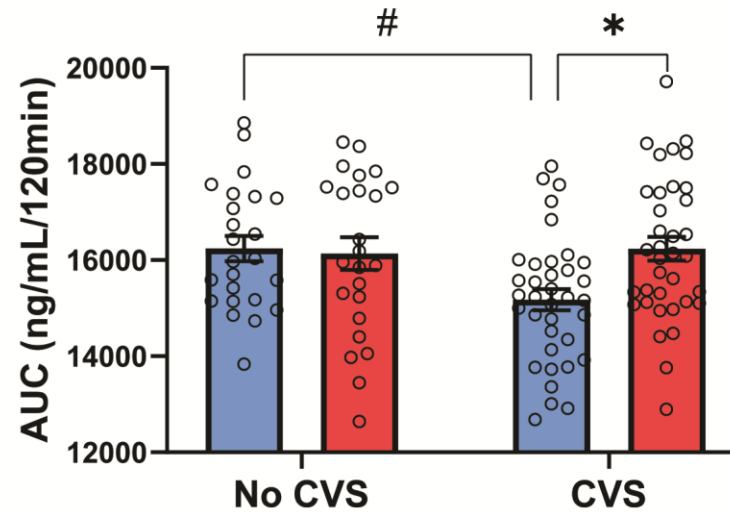**C Young GTT Corticosterone**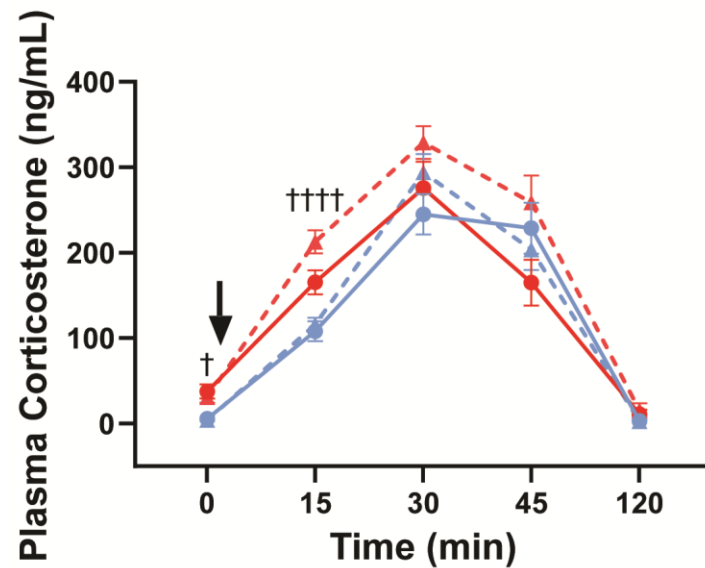**D Total Corticosterone**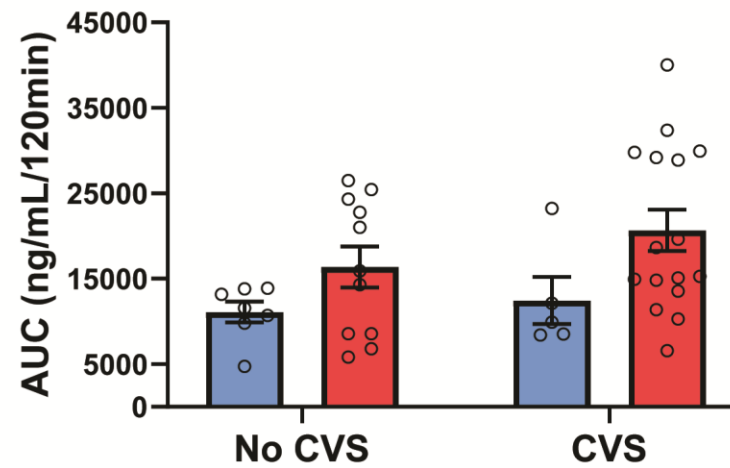

● Male No CVS    ● Female No CVS    ▲ Male CVS    ▲ Female CVS

■ Male    ■ Female

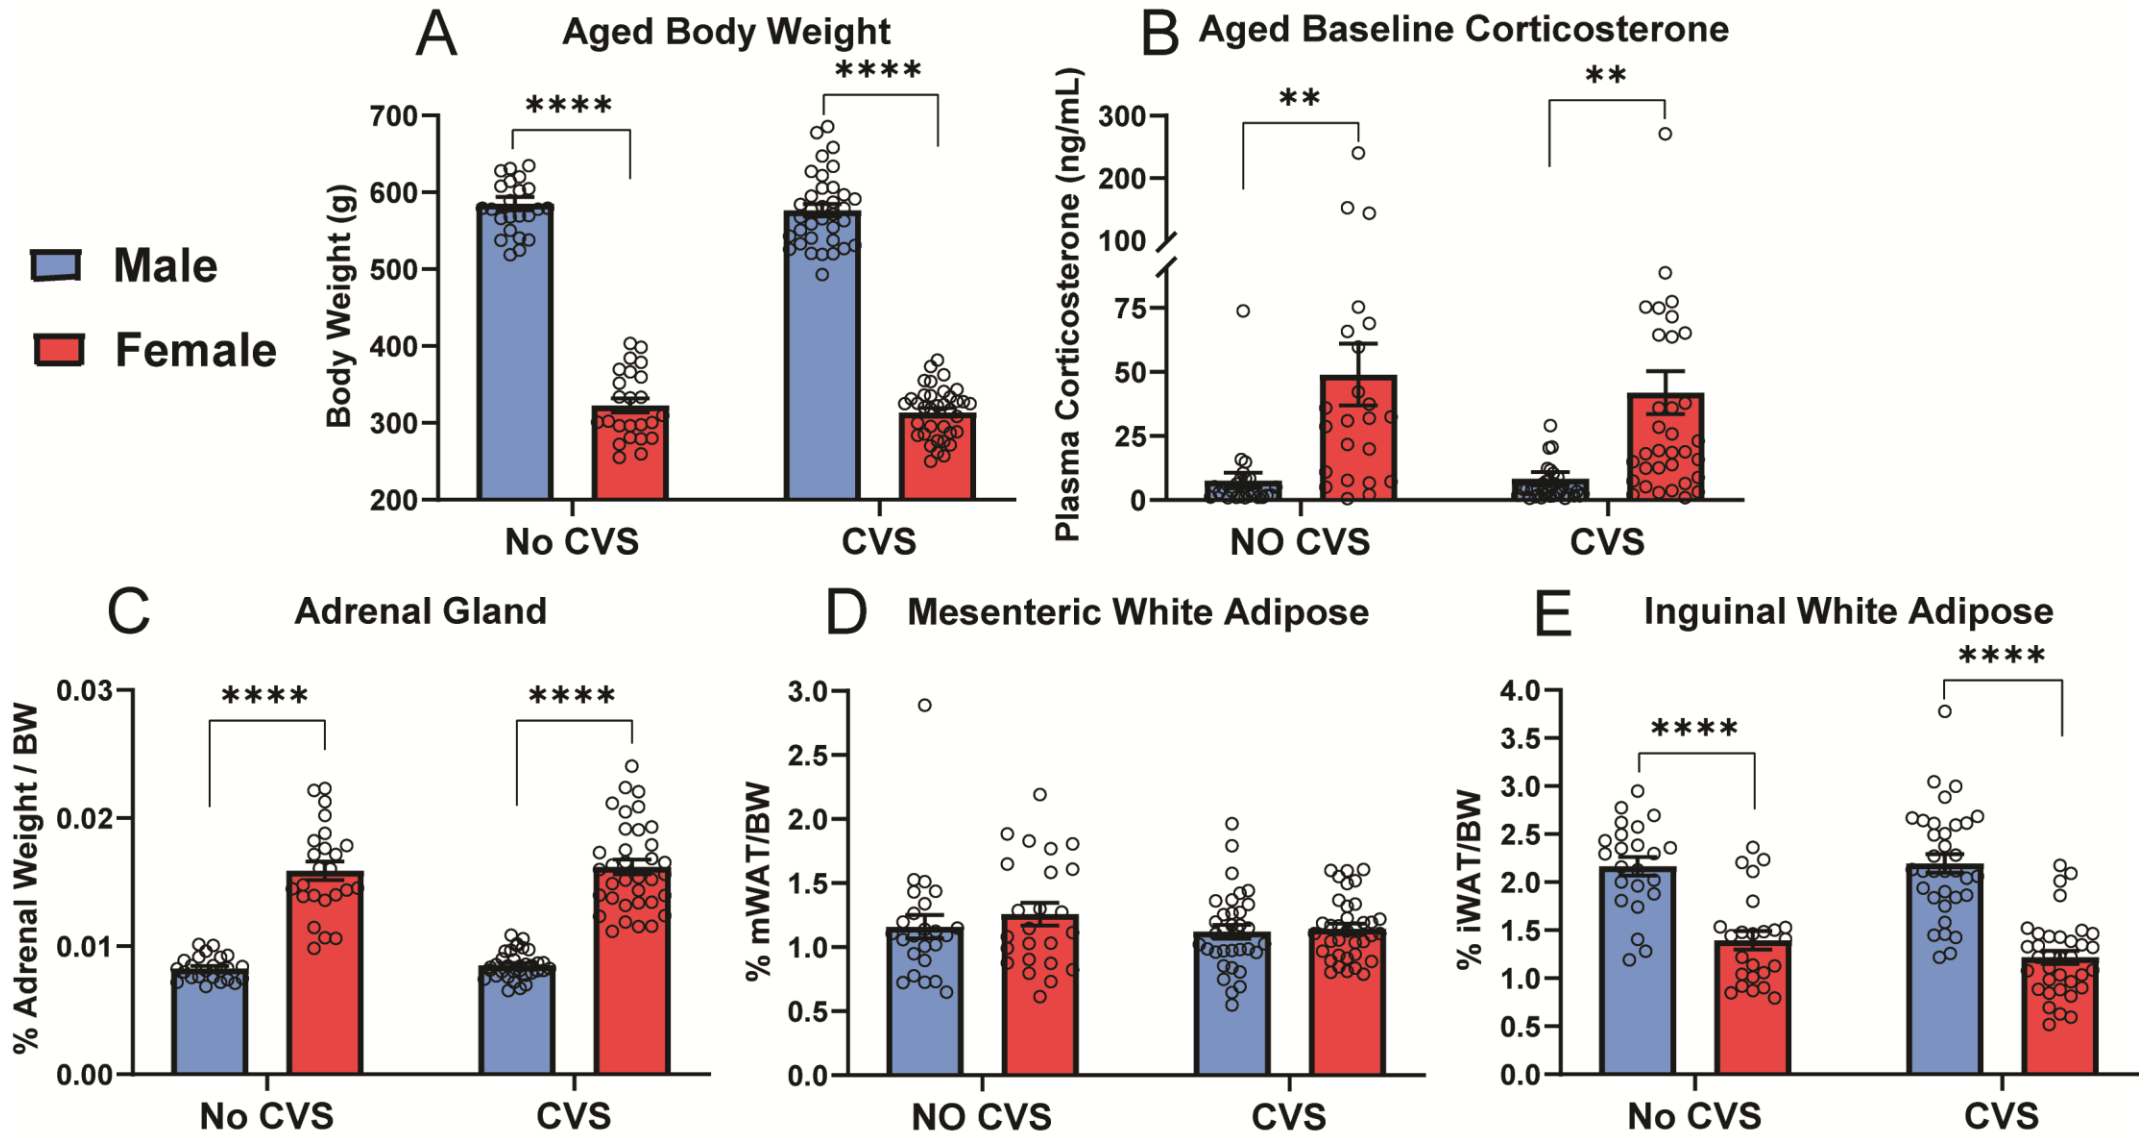

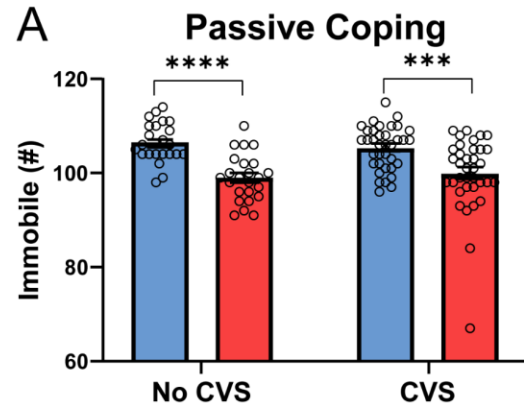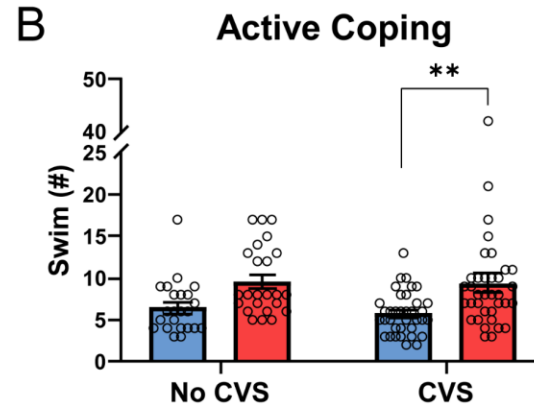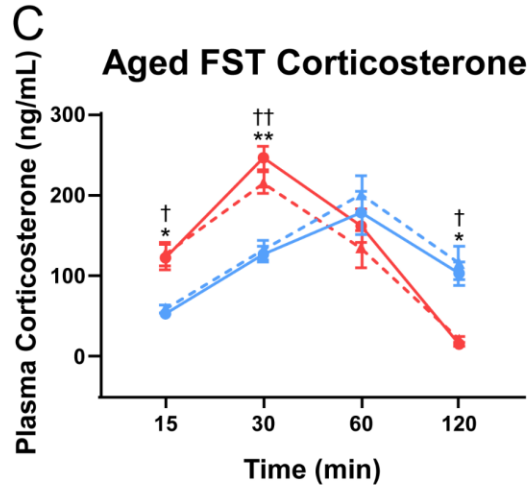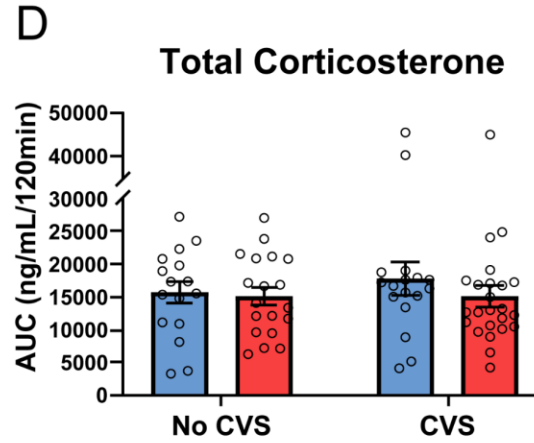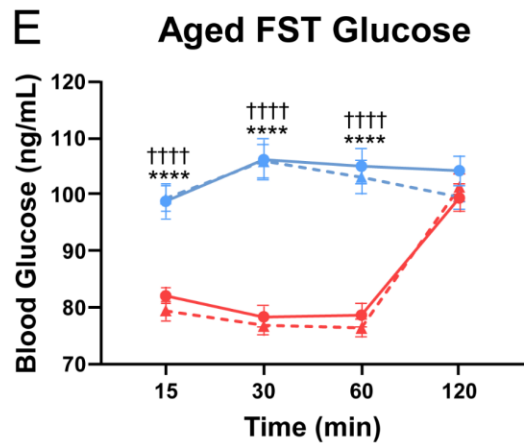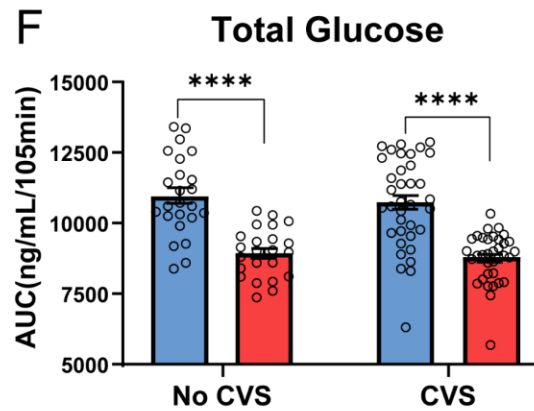

● Male No CVS    ● Female No CVS    ○ Male CVS    ○ Female CVS

■ Male    ■ Female

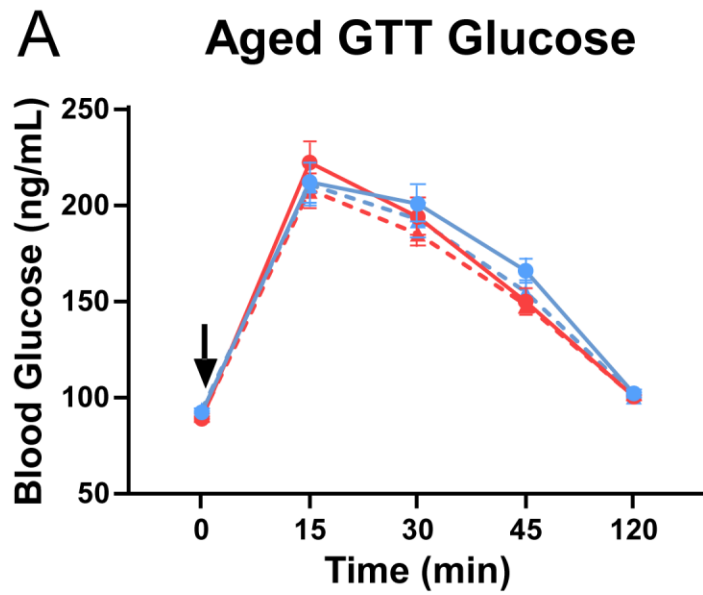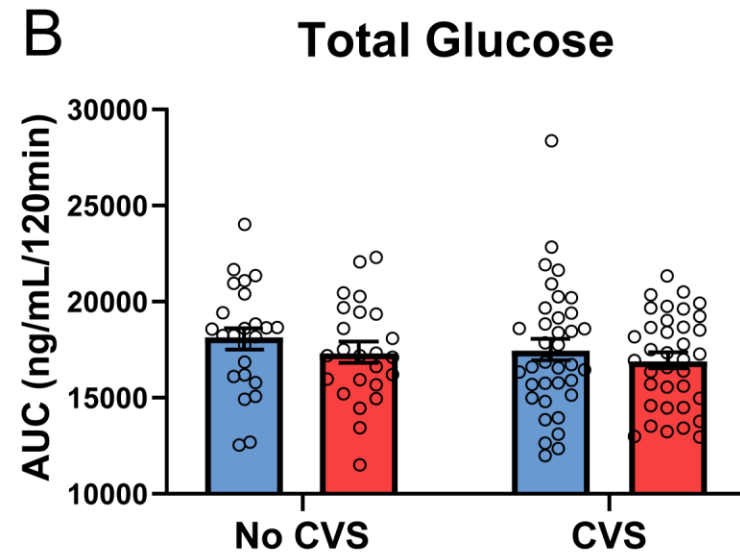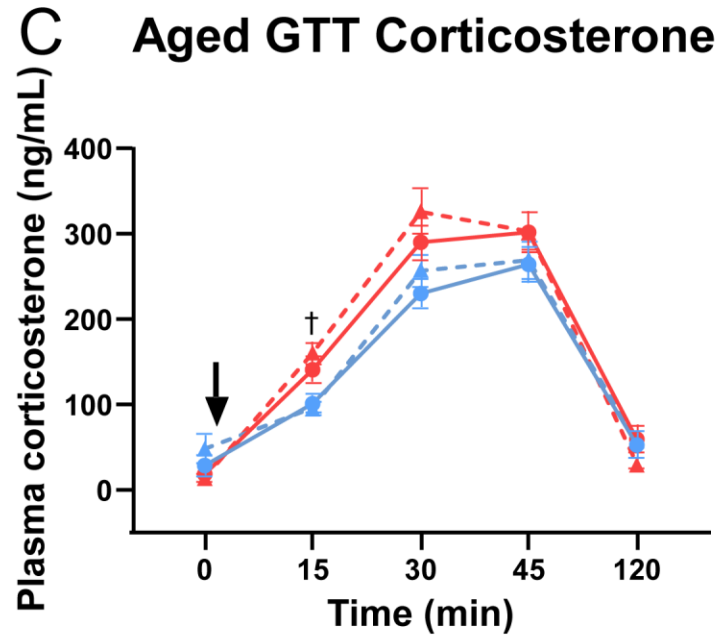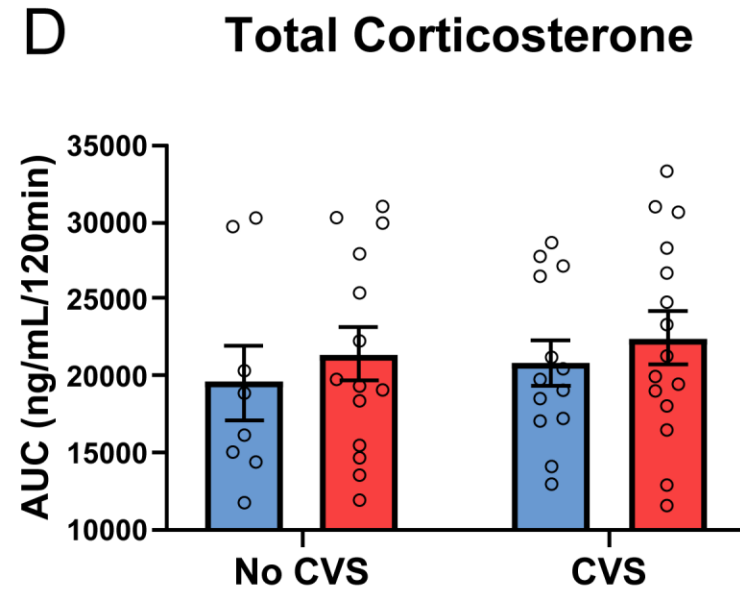

● Male No CVS   
 ● Female No CVS   
 ▲ Male CVS   
 ▲ Female CVS

■ Male   
 ■ Female





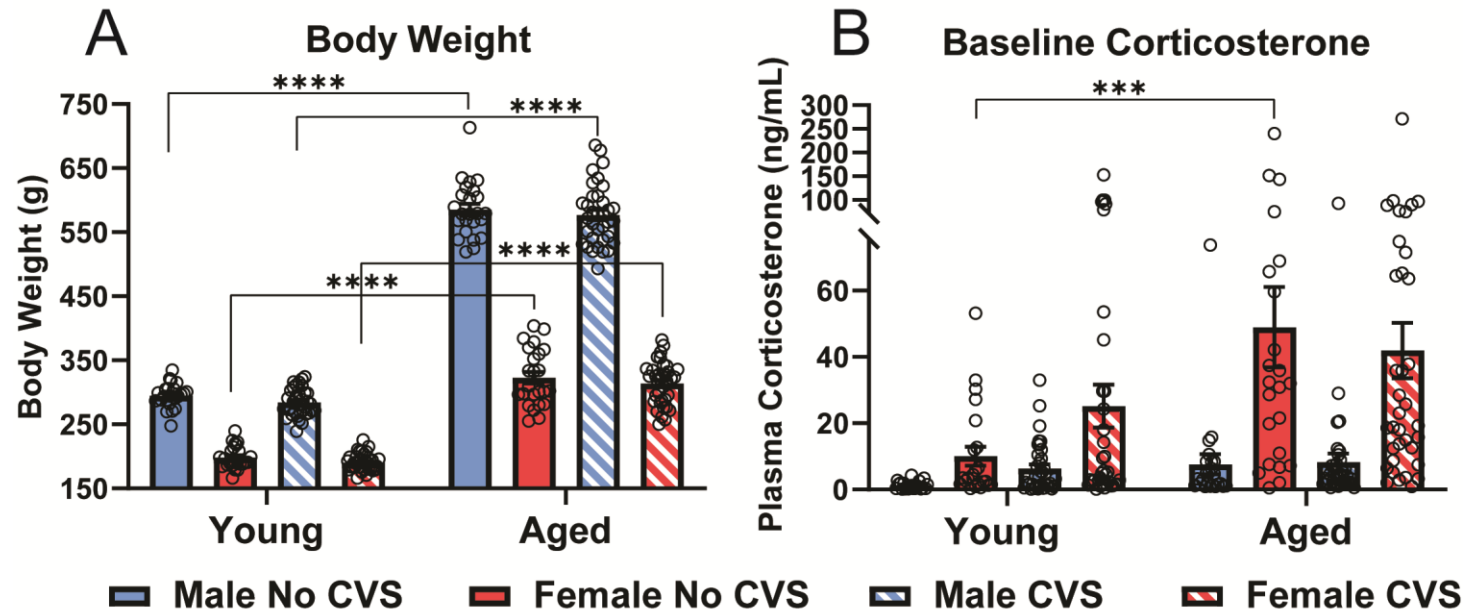

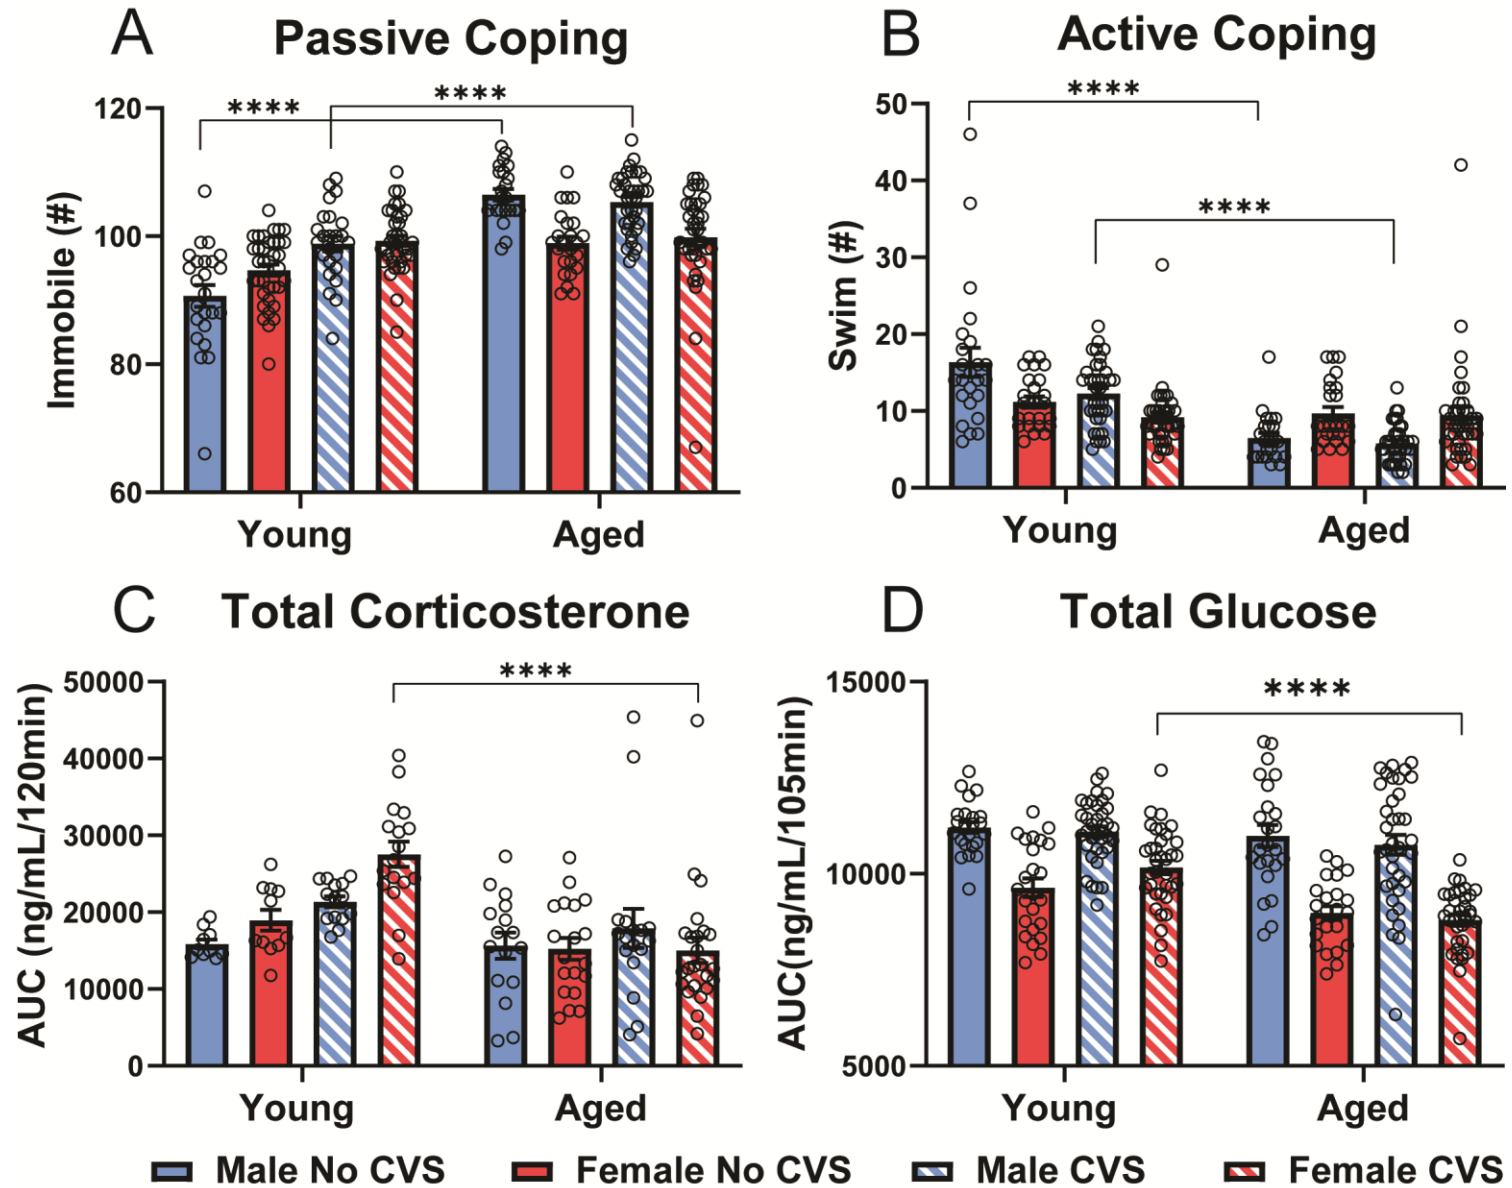

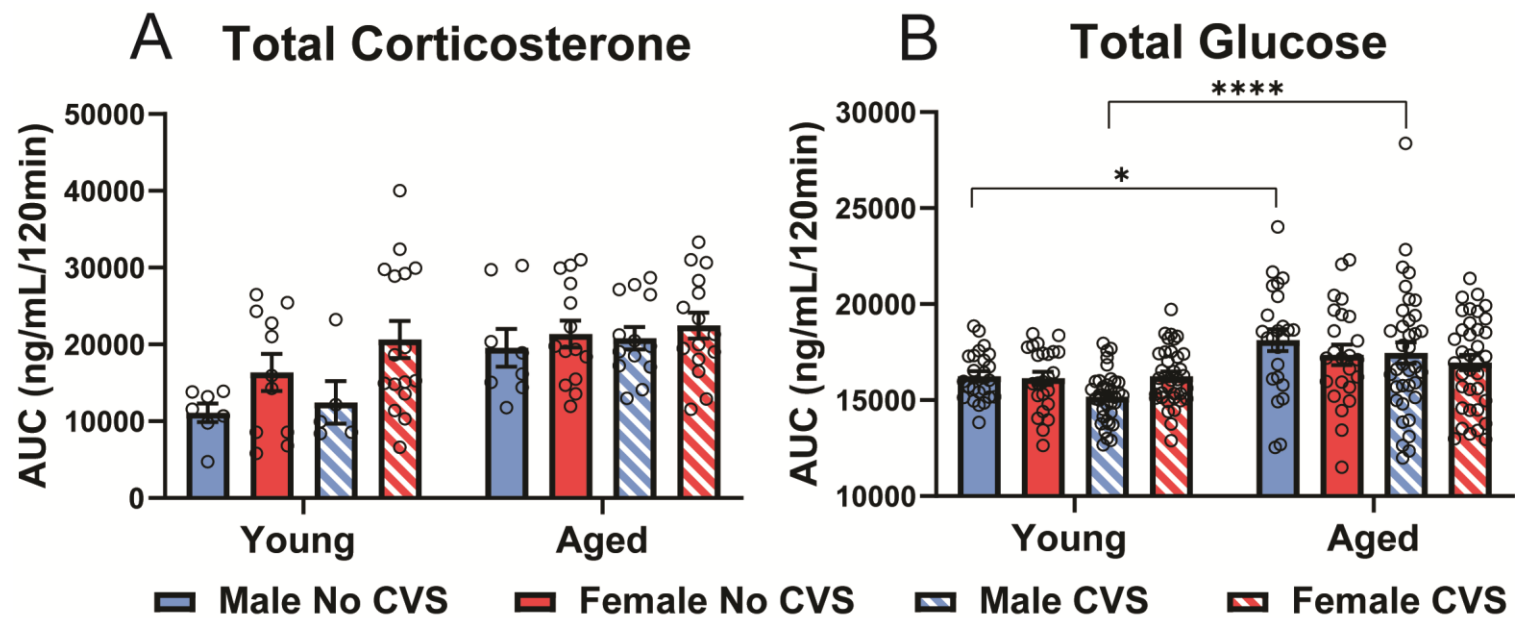

Supplement: NIHMS1740871-supplement-3.pdf [file NIHMS1740871-supplement-3.pdf]
